# Supplementary material for: Metabolomic Approaches for Detection and Identification of Biomarkers and Altered Pathways in Bladder Cancer
Source: MDPI journal article supplement (doi:10.3390/ijms23084173), 2022-04-10
Supplement: s1 [file s1]

**Supplementary Table S1:** Summary of BCa Metabolomic studies reviewed

|       | First author,<br>Year | Methods                      | Samples                                                                                                                                                                                                                                                                                                                                                                                                                                                                   | Altered metabolites                                                                                                                                                                                                                                                                                                                                                                              | Notes                                                                       | AUC                                                    | Altered<br>pathways                                                  | Refs |
|-------|-----------------------|------------------------------|---------------------------------------------------------------------------------------------------------------------------------------------------------------------------------------------------------------------------------------------------------------------------------------------------------------------------------------------------------------------------------------------------------------------------------------------------------------------------|--------------------------------------------------------------------------------------------------------------------------------------------------------------------------------------------------------------------------------------------------------------------------------------------------------------------------------------------------------------------------------------------------|-----------------------------------------------------------------------------|--------------------------------------------------------|----------------------------------------------------------------------|------|
| Urine | Pakisanti,<br>2010    | GC/TOFMS                     | 24 BCa (any stage) vs<br>51 non BCa controls                                                                                                                                                                                                                                                                                                                                                                                                                              | Senecioic acid<br>2-Butenedioic acid<br>Ribonic acid<br>2,5-Furandicarboxylic acid<br>Sumiki's acid<br>2-Propenoic acid<br>Glycerol<br>Gluconic acid<br>Valerate<br>Fructose<br>Citric acid<br>Ribitol                                                                                                                                                                                           | Decreased                                                                   |                                                        |                                                                      | [66] |
|       |                       | OPLS-DA                      |                                                                                                                                                                                                                                                                                                                                                                                                                                                                           | Melibiose<br>Uridine<br>L-Valine                                                                                                                                                                                                                                                                                                                                                                 | Increased                                                                   |                                                        |                                                                      |      |
|       | Putluri, 2011         | PLSDA                        | 83 BCa vs 51 Controls<br><br>Group 1:<br>13 BCa (prior to<br>surgery) vs 13 Controls<br>(age matched with no<br>history of BCa)<br><br>Group 2:<br>28 BCa vs 16 Controls<br>(with prior history of<br>BCa but disease free of<br>benign after<br>treatment)<br><br>Group 3:<br>34 BCa vs 11<br>Controls(with prior<br>history of BCa but<br>disease free of benign<br>after treatment)<br><br>Group 4:<br>8 BCa vs 11 Controls<br>(age matched with no<br>history of BCa) | Palmitic acid<br>Creatine<br>Histamine<br>Uracil<br>Guanine<br>D-Ribonolactone<br>Pipelicolic acid<br>Thymine<br>S-Adenosylmethionine<br>Niacinamide<br>Hippuric acid<br>N12-Acetylspermidine<br>Serine<br>Lysine<br>Spermidine<br>Carnitine<br>Tyrosine<br>3-Hydroxykynurenine<br>Phenylalanine<br>Valine<br>4-Pyridoxic acid<br>Hypoxanthine<br>Kynurenine<br>Histidine<br>Leucine/ Isoleucine | Group 1<br>Group 2<br>Group 3<br>Group 4<br><br>Group 2<br>NMIBC vs<br>MIBC | 0.790<br>0.670<br>0.620<br>0.760<br><br>0.840          |                                                                      | [67] |
|       |                       |                              |                                                                                                                                                                                                                                                                                                                                                                                                                                                                           | Nicotinuric acid<br>Aspartateaspartateglycine<br>tryptophan<br>Trehalose<br><br>Glycine<br>cysteine<br>alanine<br>lysine<br>Inosinic acid<br>Ureidosuccinic acid                                                                                                                                                                                                                                 | Increased<br><br><br><br><br><br>Decreased                                  | 0.774<br>0.743<br>0.776<br><br>0.834<br>0.720<br>0.752 |                                                                      |      |
|       | Shen, 2015            | UPLC-TOF-HRMS<br><br>OPLS-DA | 23 BCa (early stages)<br>vs 21 non BCa controls                                                                                                                                                                                                                                                                                                                                                                                                                           | Metabolite panel:<br>Dopamine 4-sulfate,<br>mg00/1846z,9z,12z,15z/00,<br>aspartyl-histidine<br>Tyrosyl-methionine                                                                                                                                                                                                                                                                                |                                                                             | 0.838                                                  | Fatty acid<br>metabolism<br>Increased<br><br>Fatty acid<br>oxidation | [69] |

|  |             |                            |                                                                |                                                                                                                                                                                                 |           |       |                                                                                                                                                     |       |
|--|-------------|----------------------------|----------------------------------------------------------------|-------------------------------------------------------------------------------------------------------------------------------------------------------------------------------------------------|-----------|-------|-----------------------------------------------------------------------------------------------------------------------------------------------------|-------|
|  |             |                            | 43 LG NMIBC vs 43 Healthy controls                             | Metabolite panel:<br>3-hydroxy-cis-5-tetradecenoylcarnitine<br>6-ketoestriol<br>Beta-cortolone<br>tetrahydrocorticosterone<br>heptylmalonic acid                                                |           | 0.899 | Decreased<br><br>Tryptophan metabolism                                                                                                              |       |
|  |             |                            | 43 LG NMIBC without hematuria vs 37 HG NMIBC without hematuria | Metabolite panel:<br>N-acetyl-4-o-acetylneuraminic acid<br>4-(2-aminophenyl)-2<br>4-dioxobutanoic acid<br>6-keto-decanoylcarnitine<br>3-hydroxydecanoyl carnitine<br>2-hydroxyloauroylcarnitine |           | 0.755 |                                                                                                                                                     |       |
|  |             |                            | 18 LG NMIBC with hematuria vs 69 HG with hematuria             | Metabolite panel<br>Indolylacryloylglycine<br>histidinyl-histidine<br>indoleacrylic acid<br>N-acetyl-5-methoxykynuramine<br>l-3-hydroxykynurenine                                               |           | 0.827 |                                                                                                                                                     |       |
|  | Jin, 2014   | HPLC-MS<br>OPLS-DA         | 138 BCa vs 121 Healthy controls                                | Succinate<br>Pyruvate<br>Oxoglutarate<br>Carnitine<br>Phosphoenolpyruvate<br>Trimethyllysine<br>Isovalerylcarnitine<br>Octenoylcarnitine<br>Acetyl-CoA                                          | increased | 0.937 | Fatty acid oxidation                                                                                                                                | [20]  |
|  |             |                            |                                                                | Melatonin<br>Glutaryl carnitine<br>Decanoylcarnitine                                                                                                                                            | decreased |       |                                                                                                                                                     |       |
|  | Loras 2018  | UPLC-TOF-MS<br><br>PLS-DA  | 27/33 BCa vs 10/11 Controls (patient 2 weeks post-TURBT)       | Phenylalanine<br>Tryptophan<br>Kynurenine<br>hydroxykynurenine<br>phenylacetylglutamine                                                                                                         |           | 0.94  | phenylalanine, arginine, proline, and tryptophan                                                                                                    | [70]  |
|  |             |                            | BCa vs Patient under surveillance                              |                                                                                                                                                                                                 |           | 0.75  |                                                                                                                                                     |       |
|  |             |                            | Controls vs patient under surveillance                         |                                                                                                                                                                                                 |           | 0.53  |                                                                                                                                                     |       |
|  | Liu, 2018   | OPLSA-DA                   | 33 BCa vs 44 age- and sex- matched healthy subjects            | Metabolite panel<br>Trans-2-dodecenoylcarnitine<br>serinyl-valine<br>feruloyl-2-hydroxyputrescine<br>3-hydroxynonanoyl carnitine                                                                |           | 0.956 | Amino acid metabolism and fatty acid oxidation upregulated, phenylalanine metabolism and xenobiotics (e.g., caffeine) metabolism were downregulated | [73]  |
|  |             |                            | 15 HG BCa vs 18 LG BCa                                         | Indolylacryloylglycine<br>N <sub>2</sub> -galacturonyl-L-lysine<br>aspartyl-glutamate                                                                                                           |           | 0.891 |                                                                                                                                                     |       |
|  | Pinto, 2021 | VOCs headspace solid-phase | 53 BCa: 26 Ta/is<br>17 T1<br>10 ≥T2<br>vs 53 Healthy controls  | (1S)-1,5-dimethyl-6,8 dioxabicyclo[3.2.1] octane<br>2-butanone<br>2-furaldehyde                                                                                                                 | Decreased | 0.800 |                                                                                                                                                     | [104] |

|       |             |                                        |                                               |                                                                                                                                                                                                                     |                                                                                               |                                                             |  |      |
|-------|-------------|----------------------------------------|-----------------------------------------------|---------------------------------------------------------------------------------------------------------------------------------------------------------------------------------------------------------------------|-----------------------------------------------------------------------------------------------|-------------------------------------------------------------|--|------|
|       |             | microextraction-GC-MS<br>PCA<br>PLS-DA |                                               | 2-methylbutanal<br>Formaldehyde<br>Hexanal<br>4-heptanone<br>Carvone<br>Piperitone<br>2 unknowns                                                                                                                    |                                                                                               |                                                             |  |      |
|       |             |                                        |                                               | 1-methylnaphthalene<br>2-methylnonane<br>2-methylnaphthalene<br>2,4-dimethylheptane<br>2,6-dimethylnonane<br>4-methyloctane<br>P-cresol<br>1,2,4-trimethylbenzene<br>4 unknowns                                     | Increased                                                                                     | 0.787                                                       |  |      |
|       |             |                                        |                                               | 17 Metabolite set (excluding unknowns)                                                                                                                                                                              | BCa vs HC<br>Ta/is vs HC<br>T1 vs HC<br>≥T2 vs HC<br>T1 vs Ta/is<br>≥T2 vs Ta/is<br>≥T2 vs T1 | 0.851<br>0.761<br>0.910<br>0.820<br>0.837<br>0.938<br>0.894 |  |      |
| Serum | Cao, 2012   | 1H-NMR<br>OPLS-DA                      | BCa vs Caluli vs Healthy controls             | Isoleucine/leucine<br>tyrosine<br>Lactate<br>Glycine,<br>Citrate                                                                                                                                                    | Decreased                                                                                     |                                                             |  | [84] |
|       |             |                                        |                                               | V/Idl<br>Glucose<br>Acetoacetate                                                                                                                                                                                    |                                                                                               |                                                             |  |      |
|       | Lin,2012    | LC-MS<br>OPLS-DA                       | 24 BCa vs 24 KC vs 24 Healthy controls        | Eicosatrienol<br>Azaprostanic acid                                                                                                                                                                                  | BCa specific biomarkers                                                                       | 0.980<br>0.977                                              |  | [85] |
|       |             |                                        |                                               | Acetylphenylalanine<br>Methyl hippuric acid                                                                                                                                                                         | Common genitourinary biomarkers                                                               | 0.847<br>0.828                                              |  |      |
|       | Liu, 2020   | LC-MS                                  | 64 BCa vs 74 KC vs 141 Healthy controls       | Homocysteine<br>Thiolactone<br>Acetylcysteine<br>Methionine<br>Sulfoximine<br>9,10,13-trihome<br>Avenoleic acid<br>(10E,12Z)-(9S)-9-Hydroperoxyoctadeca-10<br>12-dienoic acid<br>16-Hydroxy-10-oxohexadecanoic acid | Decreased in cancer groups                                                                    | 0.942                                                       |  | [86] |
|       |             |                                        |                                               | 9S, 10R-Epoxy-6Z-nonadecene                                                                                                                                                                                         | Increased in cancer groups                                                                    |                                                             |  |      |
|       | Bansal,2013 | 1HNMR<br>OPLS-DA                       | 36 LG BCa vs 31 HG BCa vs 32 Healthy controls | Dimethylamine (DMA)<br>Malonate<br>Lactate<br>Glutamine<br>Histidine<br>Valine                                                                                                                                      |                                                                                               | 0.910<br>0.905<br>0.897<br>0.891<br>0.899.<br>0878          |  | [87] |

|        |                  |                                                           |                                                                           |                                                                                                                                                                                          |                                                                                       |       |                                                                                   |      |
|--------|------------------|-----------------------------------------------------------|---------------------------------------------------------------------------|------------------------------------------------------------------------------------------------------------------------------------------------------------------------------------------|---------------------------------------------------------------------------------------|-------|-----------------------------------------------------------------------------------|------|
|        | Zhou, 2016       | GC-MS-SIM and nontargeted GC-MS<br><br>PLS-DA             | 53 HG BCa vs 48 age and sex matched Healthy controls                      | Gluconic acid<br>Xylitol<br>2-keto-gluconic acid<br>Ribose,<br>Arabitol<br>Hypoxanthine<br>Uridine<br>Hypotaurine<br>Kynurenine<br>N-acetylserine                                        | Increased                                                                             |       | PPP cycle<br>TCA cycle<br>and fatty acid<br>biosynthesis                          | [88] |
|        |                  |                                                           | 39 LG BCa vs 48 age and sex matched Healthy Controls                      | Oleic acid<br>Serine<br>3-indolepropionic acid<br>Glyoxylic acid<br>Glycolic acid<br>Hippuric acid                                                                                       |                                                                                       |       |                                                                                   |      |
|        |                  |                                                           | 101 HG/LG BCa vs 48 Healthy Controls                                      | Fumaric acid<br>Malic acid<br>Dsaccharic acid                                                                                                                                            | increased                                                                             | 0.863 |                                                                                   |      |
|        | Tan, 2016        | UHPLS-QTOFMS                                              | LG BCa vs HG BCa                                                          | Inosine<br>N1- acetyl-N2-formyl-5-methoxykynuramine<br>phosphatidylserine                                                                                                                |                                                                                       | 0.961 |                                                                                   | [89] |
|        | Vantaku, 2019    | LC-MS                                                     | 18 AA BCa VS 54 EA BCa                                                    | Taurine<br>Glutamine<br>Glutamate<br>Aspartate<br>Serine<br>Hypoxanthine<br>Uric acid                                                                                                    | Increased in AA                                                                       |       | one-carbon, tryptophan and nucleotide metabolisms (e.g. purine catabolic pathway) | [90] |
| Tissue | Putluri, 2011    | LC-MS                                                     | 27 benign adjacent vs 31 BCa vs 25 matched pairs                          | Serine<br>Asparagine<br>Valine<br>Tryptophan<br>Phenylalanine<br>Histidine                                                                                                               | Increased                                                                             |       |                                                                                   | [67] |
|        | Tripathi, 2013   | 1H-HRMS-NMR – GC-MS crossvalidation<br><br>PCA and PLS-DA | 17 ta-t1 BCa tissues vs 16 T2 BCa tissues vs 26 benign/healthy tissues vs | branched-chain amino acids (BCAAs), Lactate<br>Alanine<br>Ace<br>Glutamic acid<br>GSH<br>Glutamine<br>Aspartate<br>Cre<br>ChoCC<br>Taurine<br>myo-Inositol<br>Phenylalanine,<br>Tyrosine | Increased in BCa vs healthy<br><br>No clear segregation observed between ta-t1 and t2 | 0.970 | aerobic glycolysis (Warburg effect)<br>TCA cycle<br>anaplerosis                   | [91] |
|        | Piyarathna, 2017 | LC-MS                                                     | 126 BCas vs 39 benign adjacent/normal                                     | phosphocholines<br>phosphatidylethanolamines<br>plasmaenyl Pes                                                                                                                           | Increased                                                                             |       | cyclooxygenase-2 pathways implicated in tumor growth and metastasis               | [92] |
|        |                  |                                                           |                                                                           | Triglyceride                                                                                                                                                                             | Decreased                                                                             |       |                                                                                   |      |

|            |                |                                                           |                                                                                                                                                                                                                                                                                     |                                                     |                                                                                                       |  |                                                                                                                                                                                                                                                              |       |
|------------|----------------|-----------------------------------------------------------|-------------------------------------------------------------------------------------------------------------------------------------------------------------------------------------------------------------------------------------------------------------------------------------|-----------------------------------------------------|-------------------------------------------------------------------------------------------------------|--|--------------------------------------------------------------------------------------------------------------------------------------------------------------------------------------------------------------------------------------------------------------|-------|
|            | Yang, 2019     | LC-HRMS UPLC<br><br>PCA                                   | 48 samples collected in 4 groups: Pre-gemcitabine normal, pre-gemcitabine BCa, post-gemcitabine normal, and post-gemcitabine BCa                                                                                                                                                    | Bilirubin                                           | Decreased in BCa tissues pre-gemcitabine and insignificant level after gemcitabine                    |  | glutathione, purine and thiamine metabolism                                                                                                                                                                                                                  | [93]  |
|            |                |                                                           |                                                                                                                                                                                                                                                                                     | Retinal                                             | In T2 stage BCa vs normal<br>Decreased<br><br>And insignificant difference after gemcitabine          |  |                                                                                                                                                                                                                                                              |       |
| Cell lines | Dettmer, 2013  | LC-QTOFMS PCA (Principal Component Analysis)              | Cluster 1 HCC and 5 other cell lines of different origin (JB2 BCa LINE)<br>Cluster 2: Renal Cell Carcinoma and BCa RT4<br>CLUSTER 3: primary hepatocytes<br>Cluster 4: Mammary carcinoma lines and THE T47D melanoma cell line<br>Cluster 5: SW 480 AND SW620 colon carcinoma lines | dipeptides Val-Leu and Leu-Leu                      | Increased in RT4 (cluster 2)<br><br>Decreased in JB2 (Cluster 1)                                      |  | carrier-mediated uptake or extracellular hydrolysis followed by uptake of amino residues by amino acid transporters . pathways related to increased use of di and tripeptides ad substrates of increased bioenergetic and biosintetic demand in cancer cells | [98]  |
|            |                |                                                           |                                                                                                                                                                                                                                                                                     |                                                     |                                                                                                       |  |                                                                                                                                                                                                                                                              |       |
|            |                |                                                           |                                                                                                                                                                                                                                                                                     |                                                     |                                                                                                       |  |                                                                                                                                                                                                                                                              |       |
|            | Conde, 2015    | ( 1H-NMR) and spectra analysis                            | RT4 (less invasive) vs TCCSUP cell lines (more invasive)                                                                                                                                                                                                                            | glucose                                             | Decreased in both                                                                                     |  | metabolism of pyruvate                                                                                                                                                                                                                                       | [99]  |
|            |                |                                                           |                                                                                                                                                                                                                                                                                     | Pyruvate                                            | Decreased in TCCSUP                                                                                   |  |                                                                                                                                                                                                                                                              |       |
|            |                |                                                           |                                                                                                                                                                                                                                                                                     | Alanine                                             | Increased in TCCSUP                                                                                   |  |                                                                                                                                                                                                                                                              |       |
|            | Petrella, 2020 | 1H-NMR spectroscopy exometabolome analysis<br><br>OPLS-DA | 5637 vs RT112 vs RT4 cell lines                                                                                                                                                                                                                                                     | Glucose<br>Glutamine<br>serine<br>BCAAs<br>arginine | Decreased in each one line(consumed)<br>Glucose: similar                                              |  | Glycolysis is the Most Active Metabolic Pathway in 5637 Cells<br><br>RT Cells Show an Active Oxidative Metabolism                                                                                                                                            | [100] |
|            |                |                                                           |                                                                                                                                                                                                                                                                                     | Alanine<br>Lactate<br>Pyruvate<br>formate           | Increased in each one line (excreted)<br>Lactate: 5637/RT112 > RT4<br><br>Alanine: RT4 > RT112 > 5637 |  |                                                                                                                                                                                                                                                              |       |

|  |                 |                                                 |                                                                        |                                                                                                                                                                        |                                                              |                                  |                                                                                                                                                                               |       |
|--|-----------------|-------------------------------------------------|------------------------------------------------------------------------|------------------------------------------------------------------------------------------------------------------------------------------------------------------------|--------------------------------------------------------------|----------------------------------|-------------------------------------------------------------------------------------------------------------------------------------------------------------------------------|-------|
|  | Rodrigues, 2019 | GC-MS endometabolome analysis<br><br>PCA PLS-DA | J82 vs 5637 Cell lines                                                 | Glycine<br>Myristic acid<br>Palmitic acid<br>palmitoleic acid                                                                                                          | Decreased in J82                                             | 0.960<br>1.000<br>1.000<br>1.000 | Ammonia recycling, fatty acid biosynthesis, and methionine and glutamate metabolisms                                                                                          | [101] |
|  |                 |                                                 |                                                                        | Leucine<br>Methionine<br>Valine<br>Aspartic acid                                                                                                                       | Increased in J82                                             | 0.880<br>0.920<br>0.920<br>0.960 |                                                                                                                                                                               |       |
|  | Iliou, 2020     | 1H-NMR spectroscopy<br><br>PCA PLS-DA           | RT4 (grade I)<br>RT112 (grade II)<br>T24 (grade III) TCCSUP (grade IV) | Myo-inositol<br>Creatine phosphate<br>Histidine<br>Malate<br>Succinate, Acetate<br>AMP<br>ADP<br>ATP<br>GTP<br>UMP<br>Oxypurinol                                       | Increased in T24<br><br>Decreased In RT4 and TCCSUP          |                                  | Metabolic inversion                                                                                                                                                           | [102] |
|  |                 |                                                 |                                                                        | Uracil<br>Propylene glycol                                                                                                                                             | Decreased in T24 and TCCSUP                                  |                                  |                                                                                                                                                                               |       |
|  |                 |                                                 |                                                                        | Tryptophan<br>Formate<br>Uracil<br>Adenine<br>Propylene glycol<br>Choline                                                                                              | Ratio decreased in grade III (T24) compared to grade I (RT4) |                                  |                                                                                                                                                                               |       |
|  | Rodrigues, 2018 | HSSPME/GC-MS VOCs extraction<br><br>OPLS-DA     | Scaber J82<br>5637<br>SV-HUC-1 (normal)                                | 2-pentadecanone<br>A-terpineol<br>2-methylbutan-2-ol<br>1-phenylethanol<br>2-phenylpropan-2-ol<br>2-hydroxy-2-methyl-1-phenylpropan-1-one                              | Scaber vs SV-HUC-1 Ph7                                       | 1.000                            | synthesis of fatty acids for membrane formation or $\beta$ -oxidation of fatty acids for energy production, amino acids metabolism, oxidative stress and inflammation process | [103] |
|  |                 |                                                 |                                                                        | Benzoic acid<br>2-methyl-2-heptanol<br>1-butanol<br>A-methylstyrene<br>unknown 25                                                                                      | Scaber vs SV-HUC-1 Ph2                                       | 1.000                            |                                                                                                                                                                               |       |
|  |                 |                                                 |                                                                        | 4-methylbenzaldehyde<br>cyclohexanone<br>2-pentadecanone<br>2-phenylpropan-2-ol<br>phenol<br>dodecane<br>4-methylheptan-2-one<br>$\gamma$ -dodecalactone<br>unknown 24 | J82 vs SV-HUC-1                                              | 1.000                            |                                                                                                                                                                               |       |
|  |                 |                                                 |                                                                        | 1-phenylethanol<br>4-methylnonane<br>dodecane<br>$\gamma$ -dodecalactone<br>unknowns 10 and 24                                                                         | 5637 vs SV-HUC-1                                             | 1.000                            |                                                                                                                                                                               |       |

|  |  |  |  |                                                                                                                                                                 |                                                                      |       |  |  |
|--|--|--|--|-----------------------------------------------------------------------------------------------------------------------------------------------------------------|----------------------------------------------------------------------|-------|--|--|
|  |  |  |  | benzaldehyde<br>2-nonanone<br>4-methylheptan-2-one<br>dodecane 2<br>3-dimethylhexane<br>hexadecane<br>tetradecane                                               | Increased in<br>BCa lines<br>medium vs<br>normal line<br>medium      | 1.000 |  |  |
|  |  |  |  | 2-phenylpropanol<br>isopentanol                                                                                                                                 | Decreased in<br>BCa cell lines<br>medium vs<br>normal line<br>medium | 1.000 |  |  |
|  |  |  |  | acetophenone<br>$\alpha$ -terpineol<br>nonanal<br>2-phenylpropan-2-ol<br>4-methylnonane<br>6-methylheptan-2-one                                                 | Decreased in<br>J82 and<br>Scaber vs<br>5637<br>medium               | 1.000 |  |  |
|  |  |  |  | Dodecanol<br>dodecanal<br>$\gamma$ -nonalactone                                                                                                                 | Increased in<br>J82 and<br>Scaber vs<br>5637<br>medium               | 1.000 |  |  |
|  |  |  |  | 1-phenylethanol<br>$\alpha$ -terpineol<br>(2E,4E)-Deca-2,4-dienal<br>Benzaldehyde<br>Benzoic acid<br>Geranylacetone<br>2-pentadecanone<br>$\gamma$ -nonalactone | Increased in<br>J82 vs<br>Scaber                                     | 1.000 |  |  |
|  |  |  |  | Phenol<br>Nonanal<br>n-butyl acetate<br>acetophenone<br>Cyclohexanone<br>Naphthalene                                                                            | Decreased in<br>J82 vs 5637<br>medium                                | 1.000 |  |  |
